# Supplementary material
Source: PubMed Central journal article supplement (PMC9357223)

Uncut Blot Images

Uncut GEL Images

**Figure 1**

**1C**

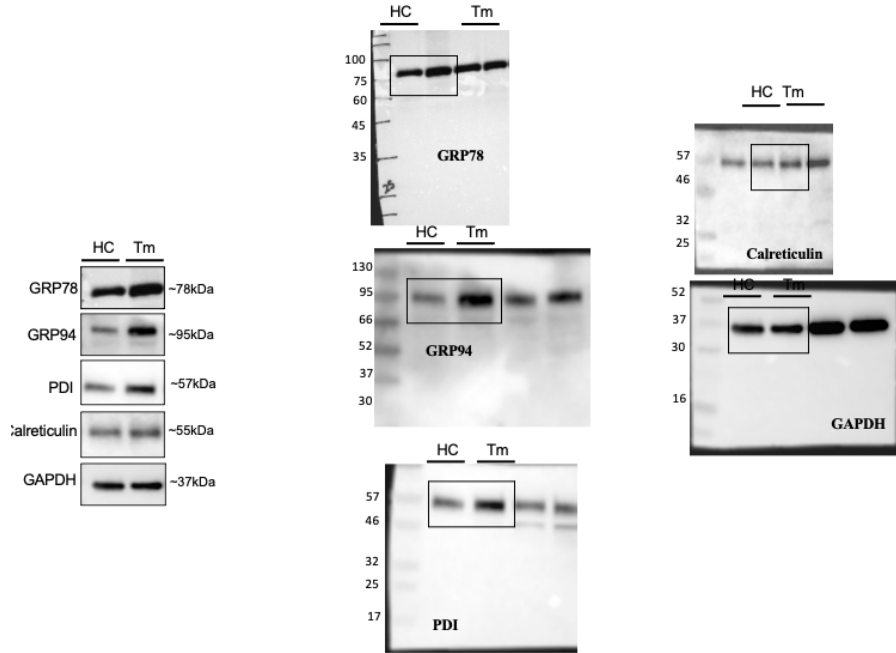

**1F**

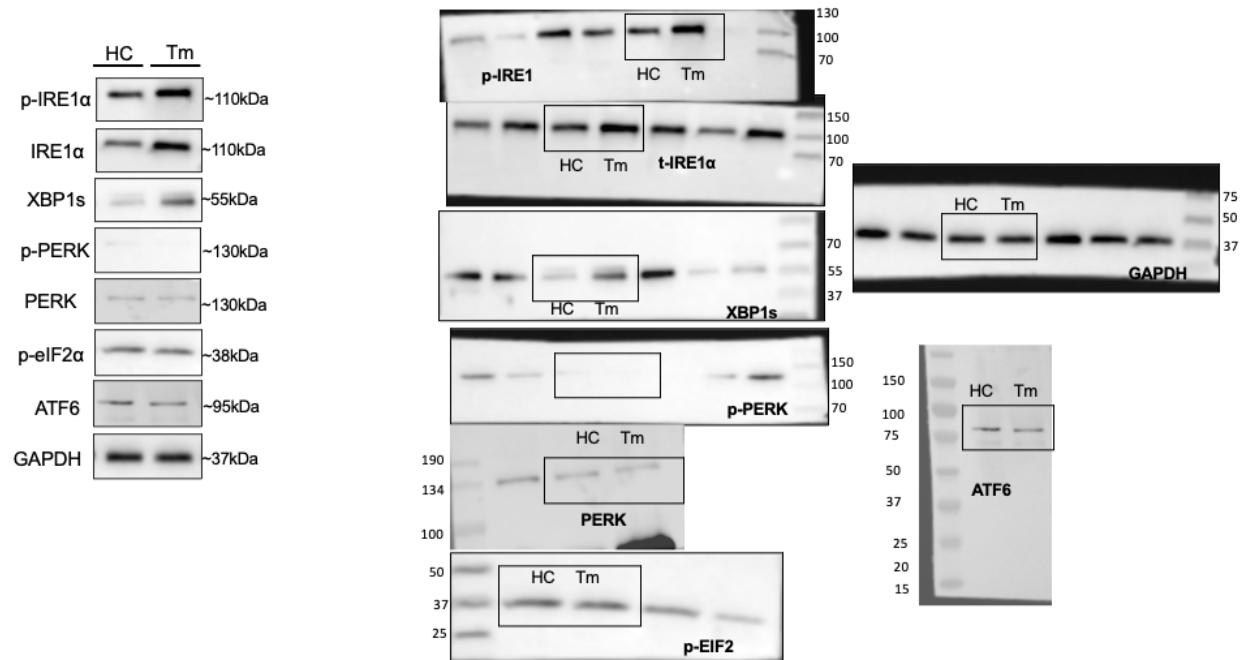

Uncut Blot Images

1M

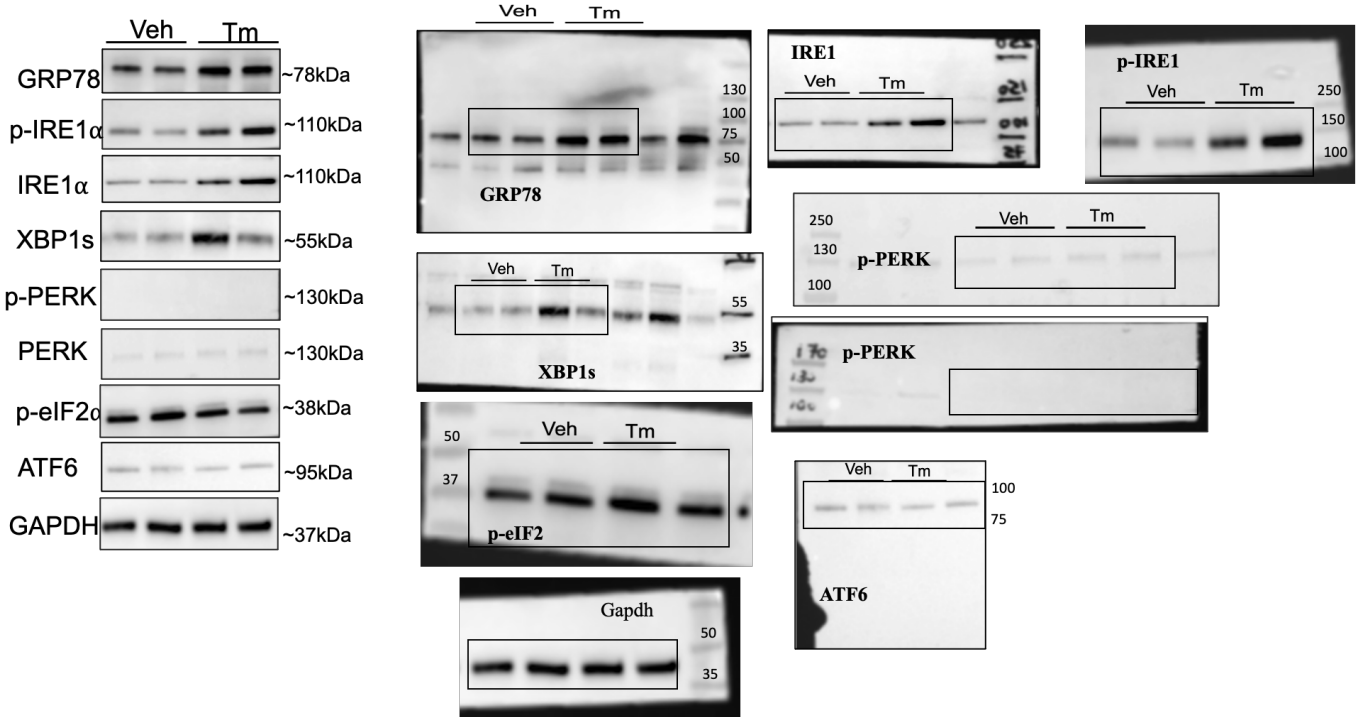

## Uncut Blot Images

**Figure 2****2B**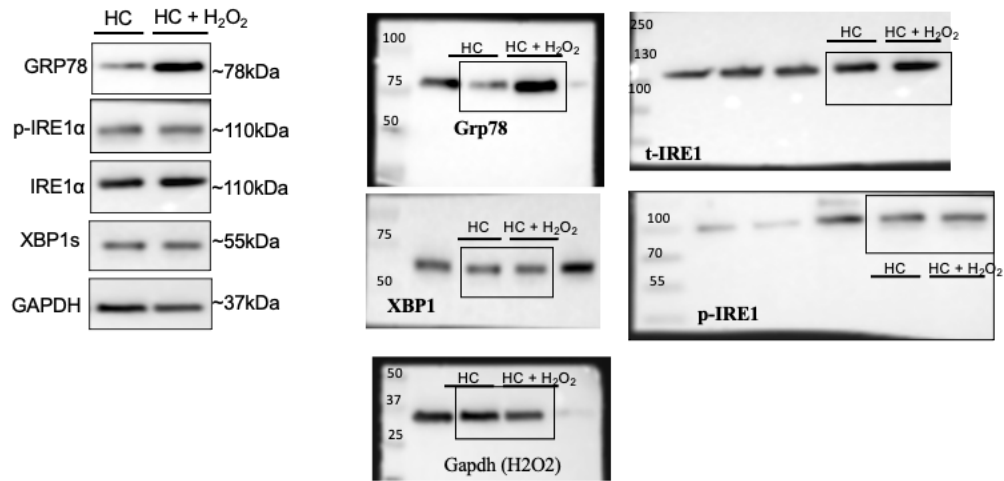**2E**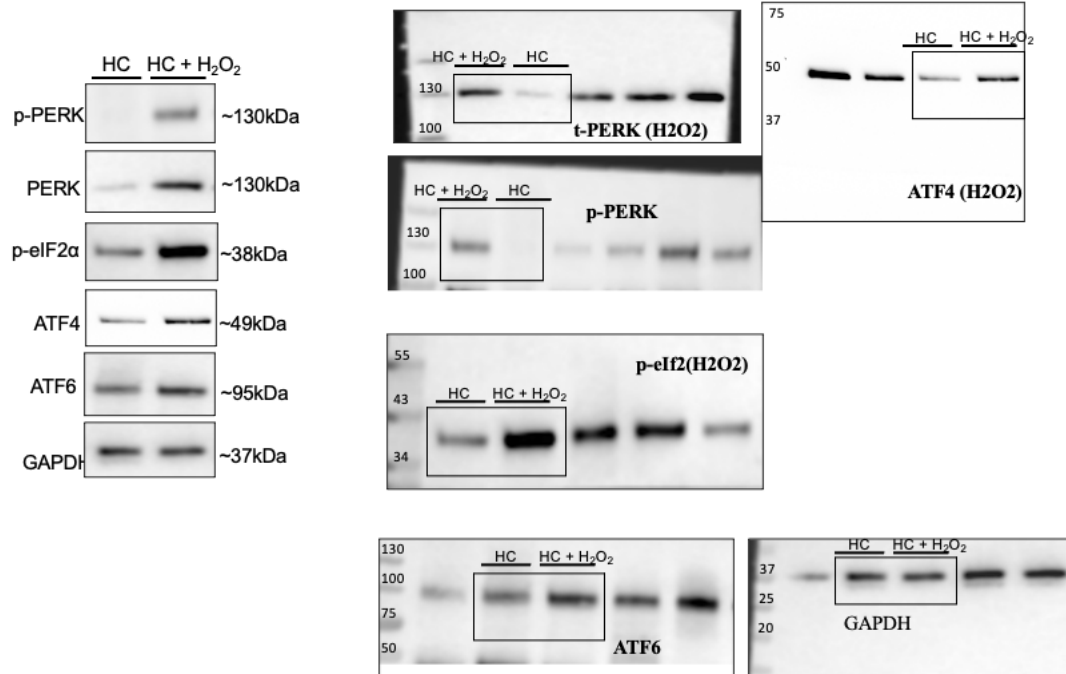

## Uncut Blot Images

21

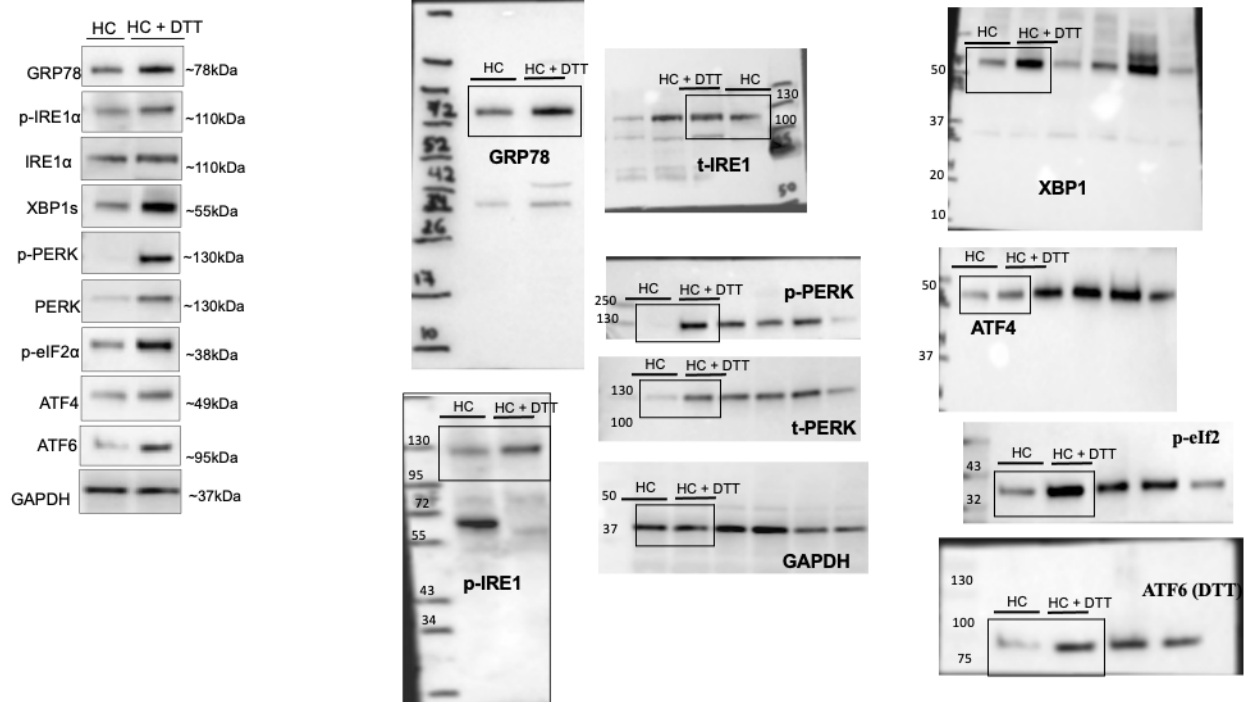

Uncut Blot Images

**Figure 4**

**4A**

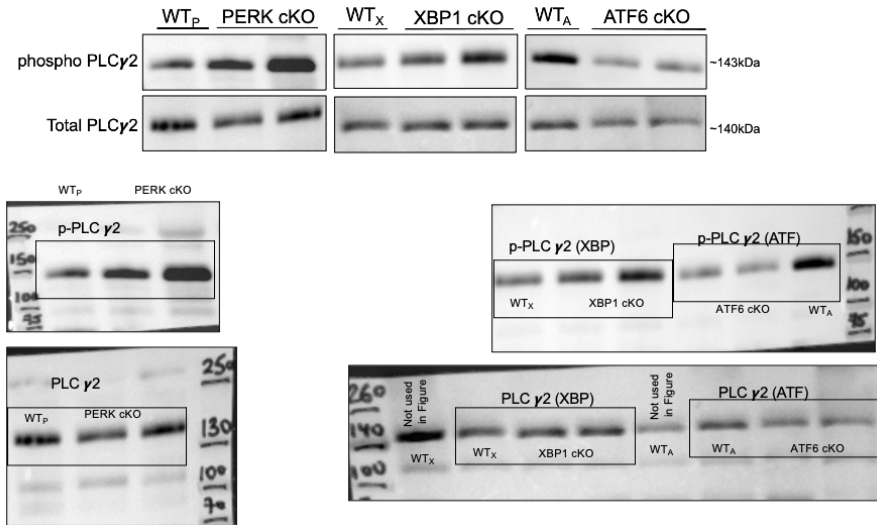

**4B**

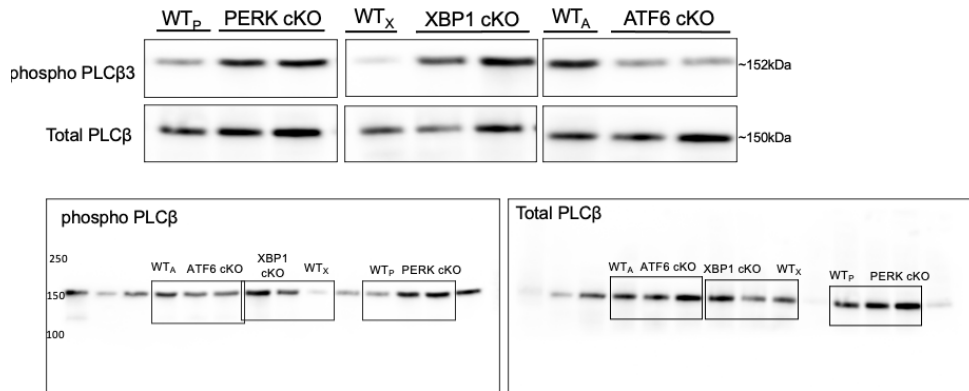

**4C**

Uncut Blot Images

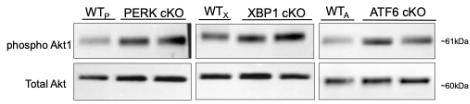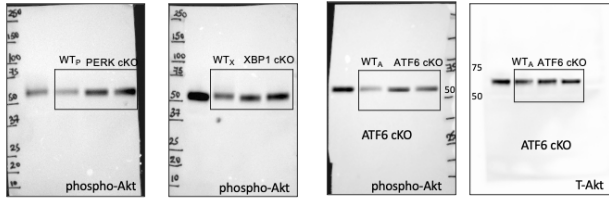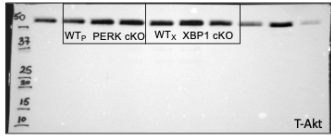

4D

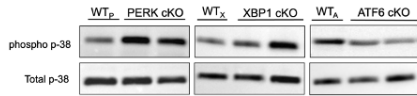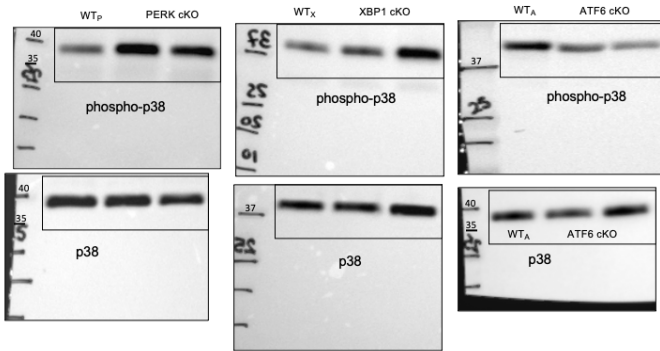

4E

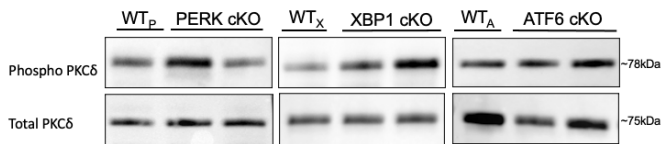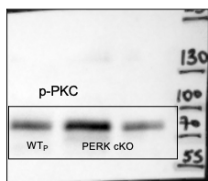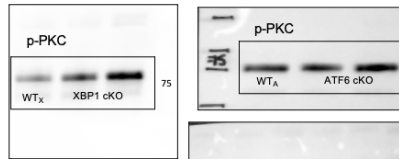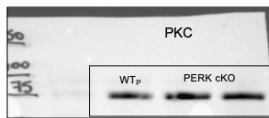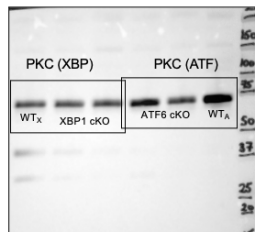

4F

Uncut Blot Images

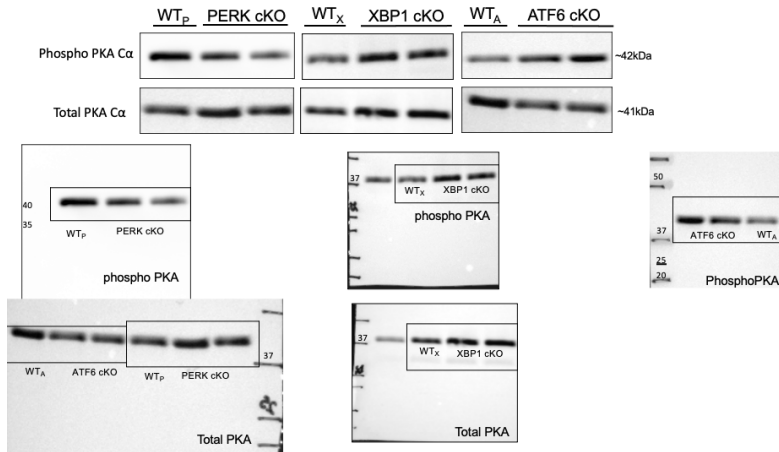

**Figure 5**

5E

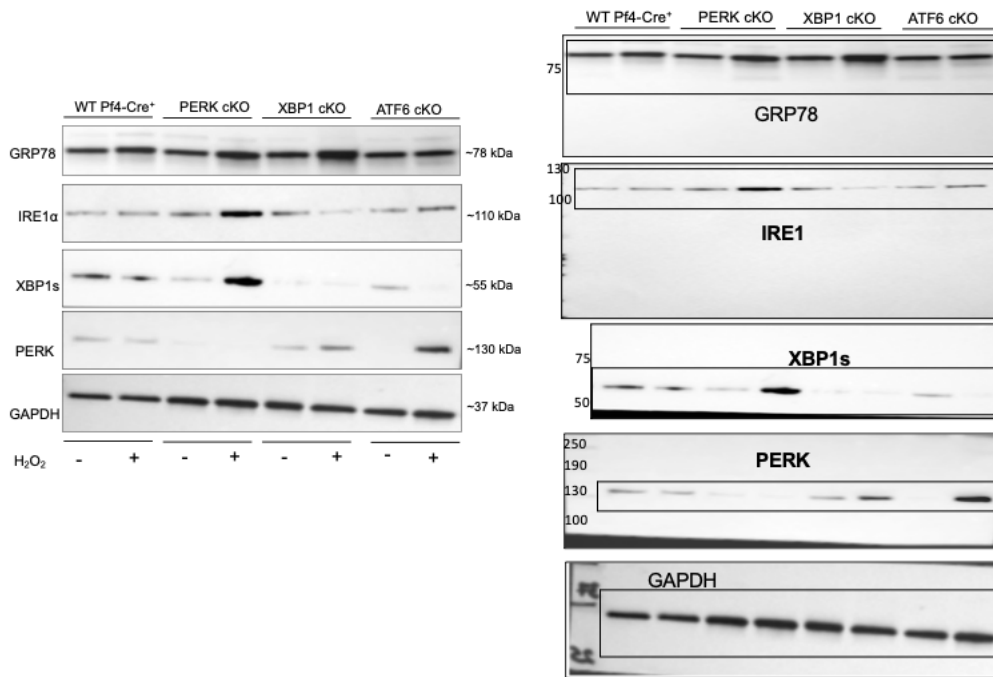

**Figure 6**

6D

Uncut Blot Images

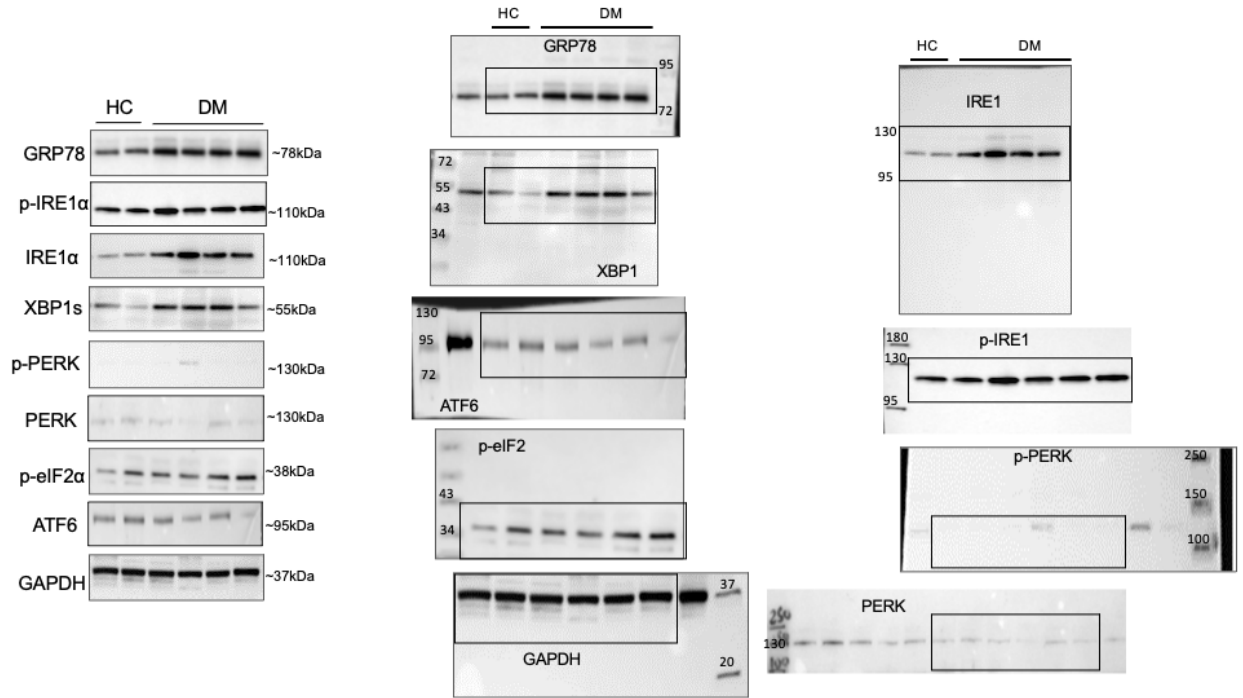

SUPPLEMENTARY FIGURES

Fig S1

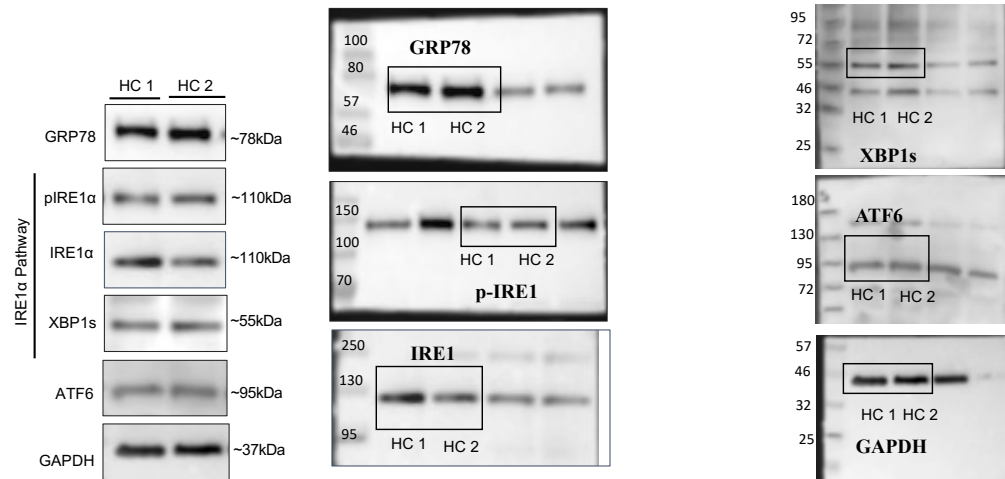



Uncut Blot Images

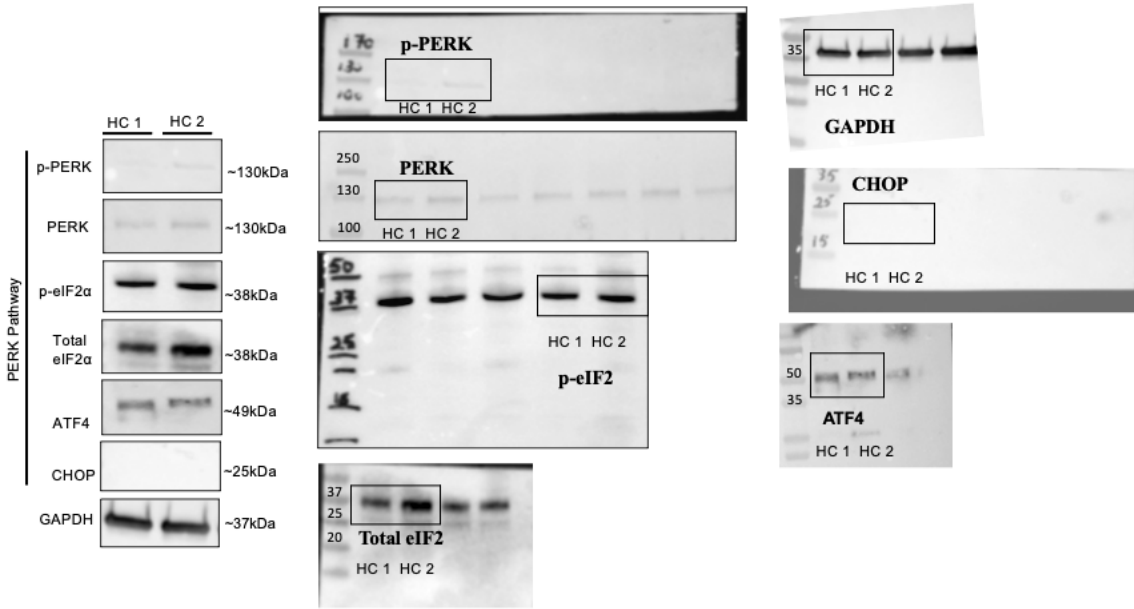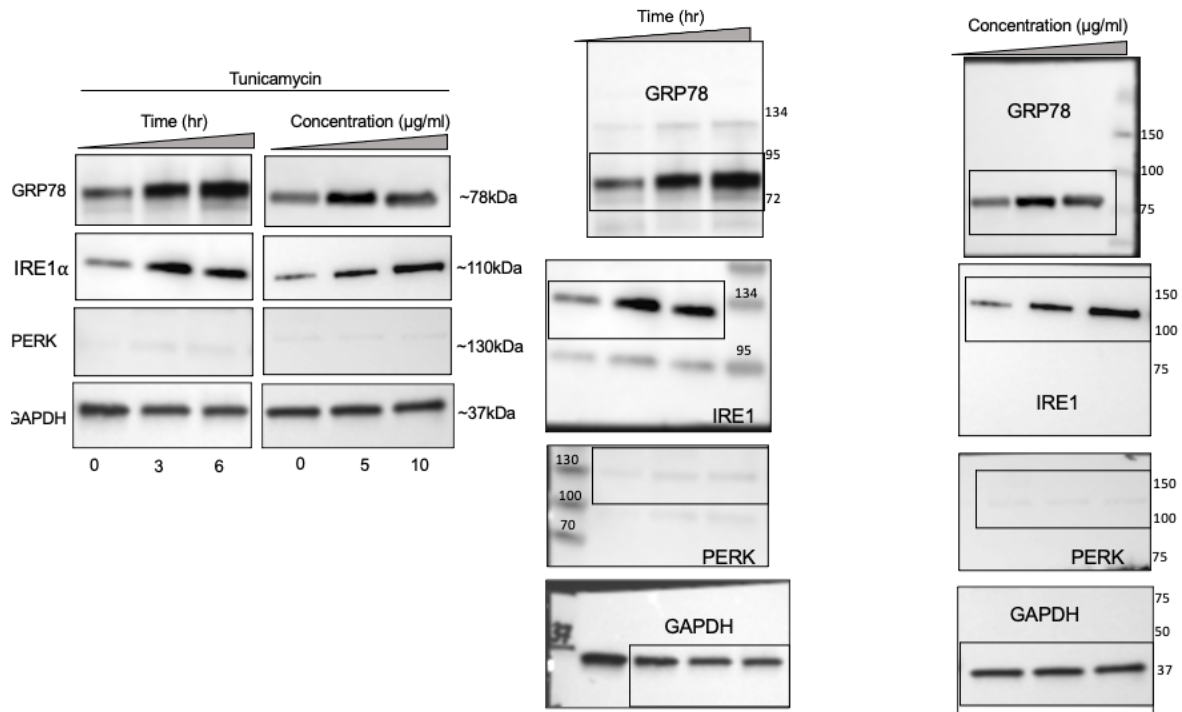

Figure S2

Uncut Blot Images

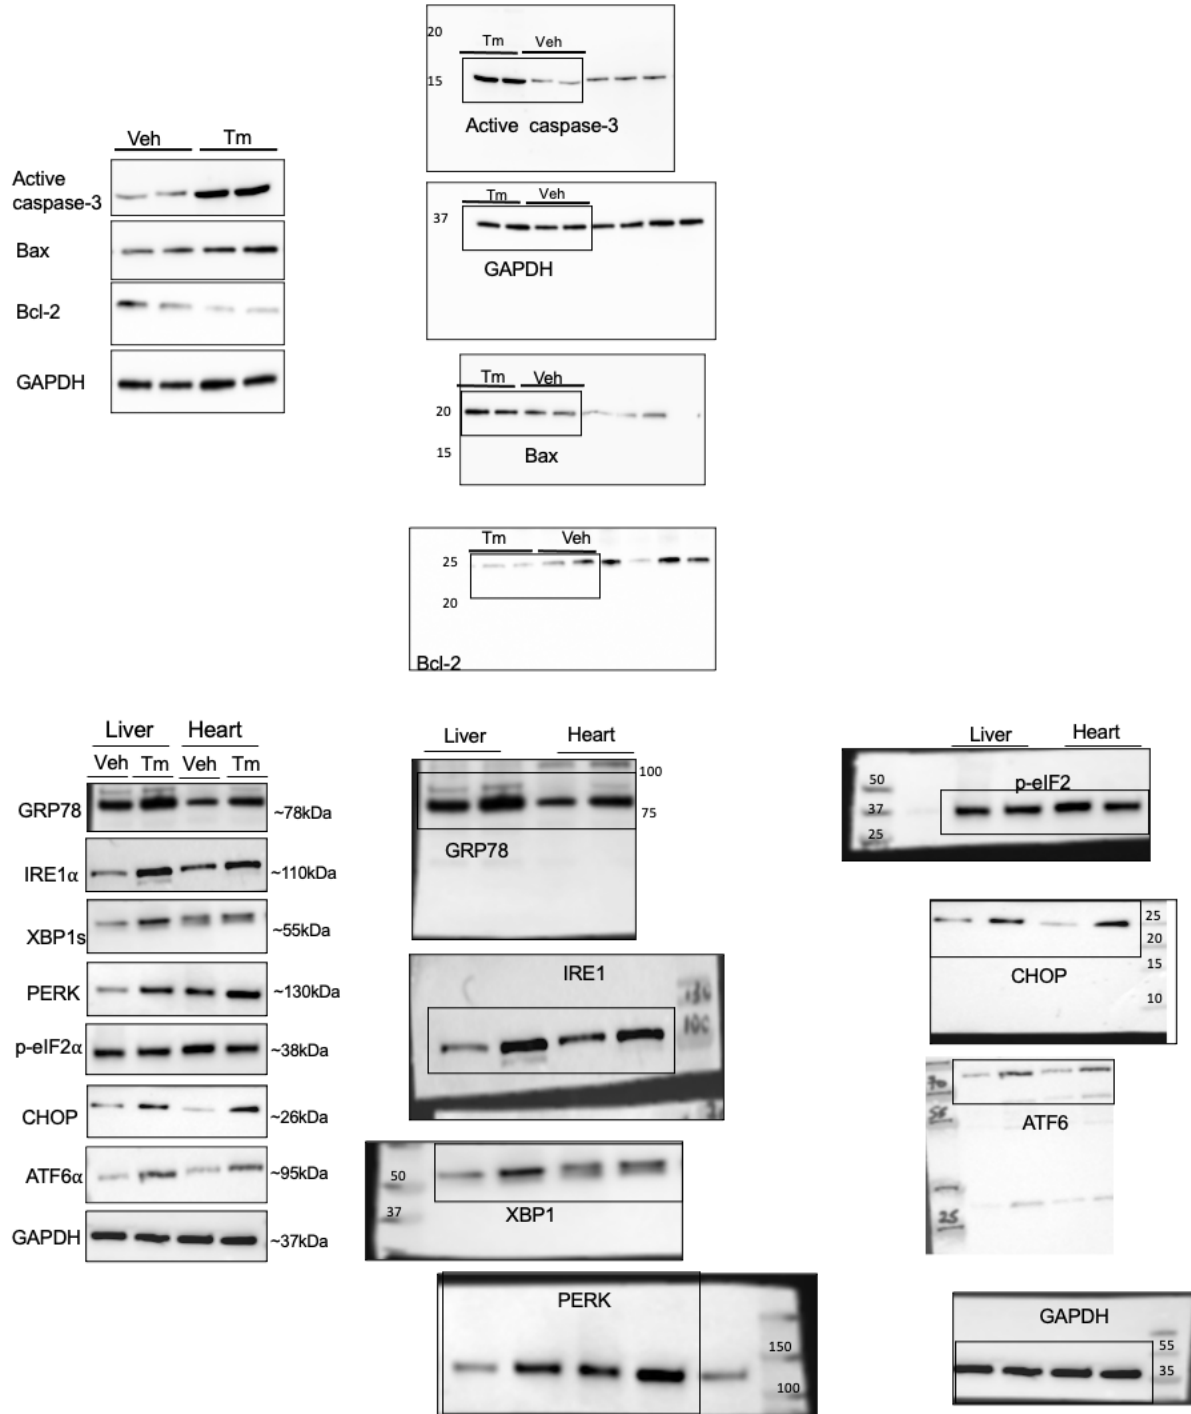

Fig S3

Uncut Blot Images

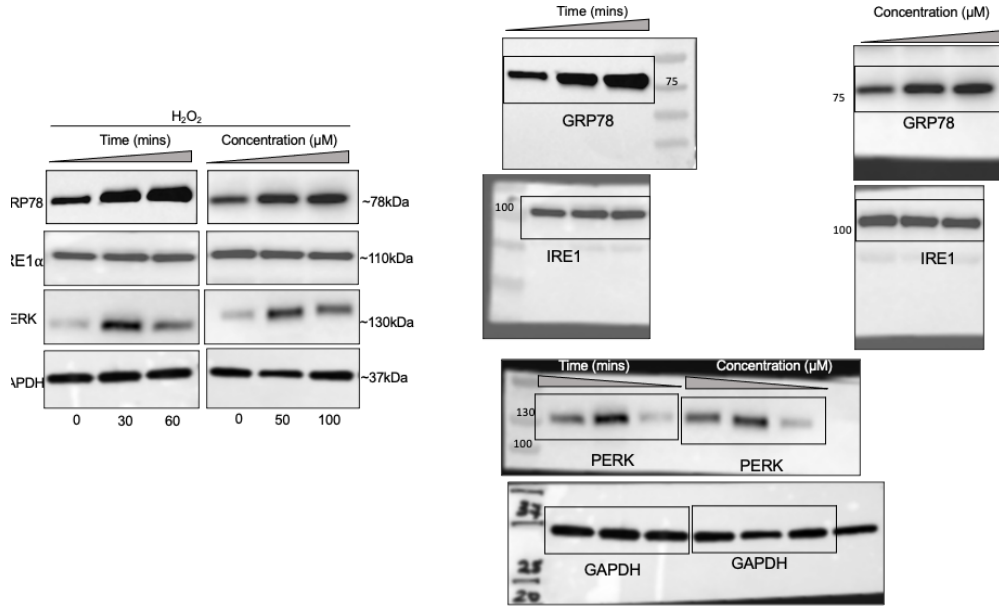

Fig S7

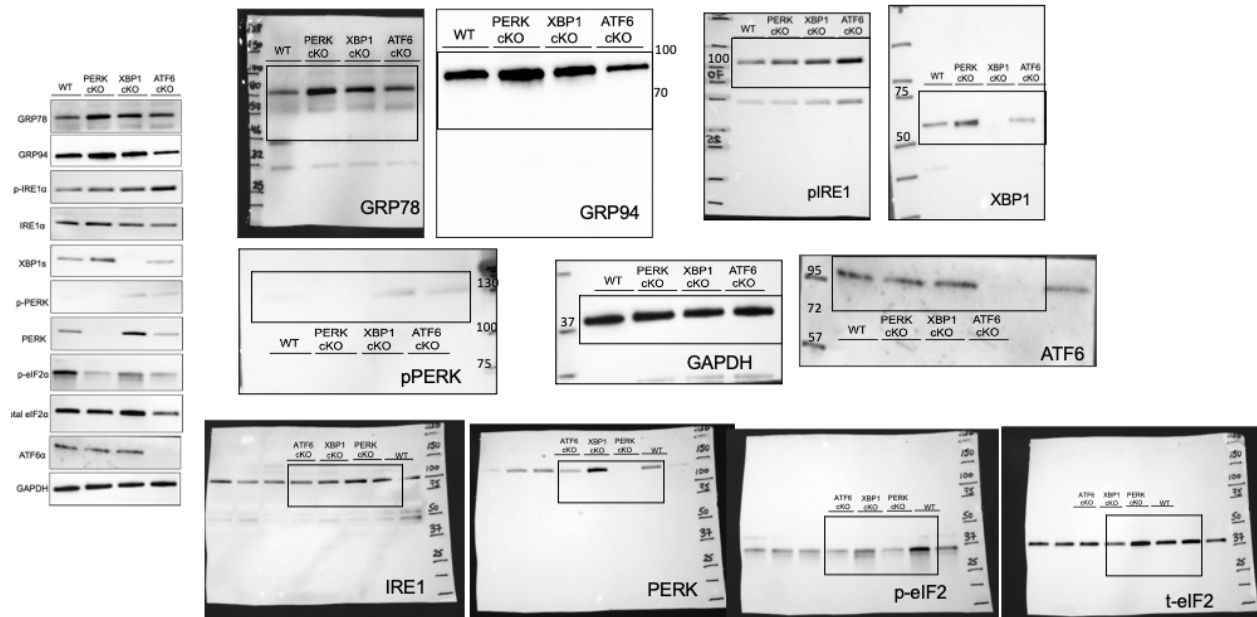

Uncut Blot Images

Fig S11

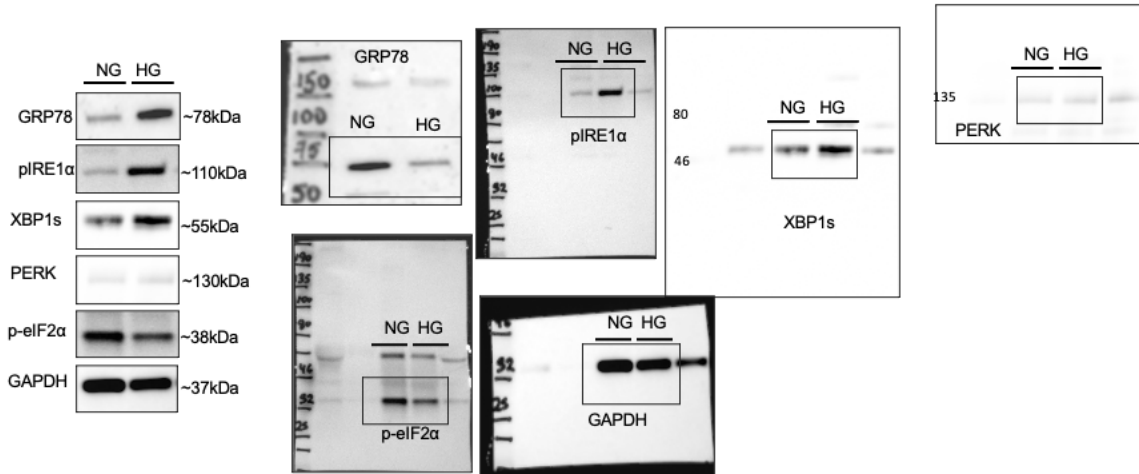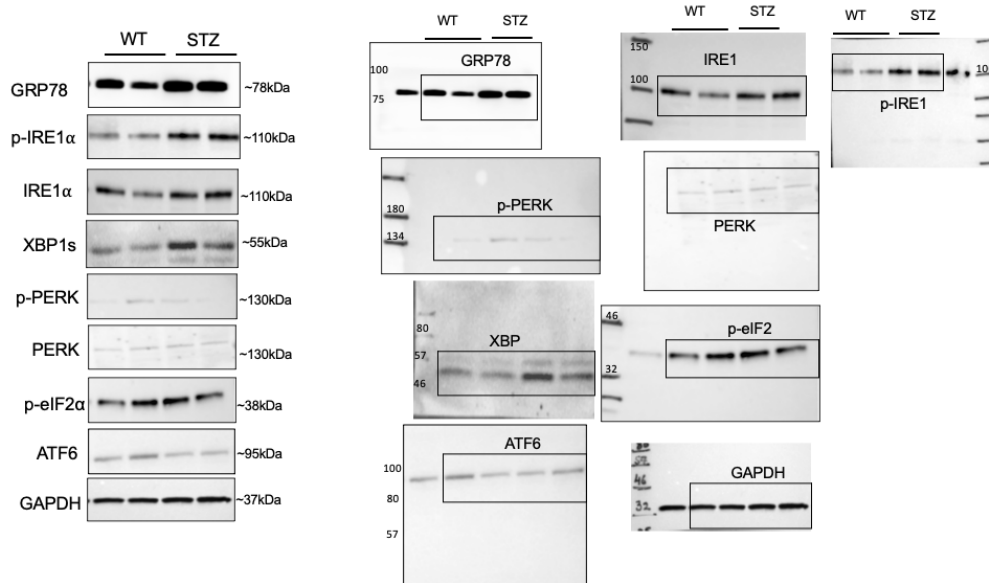

Uncut Blot Images

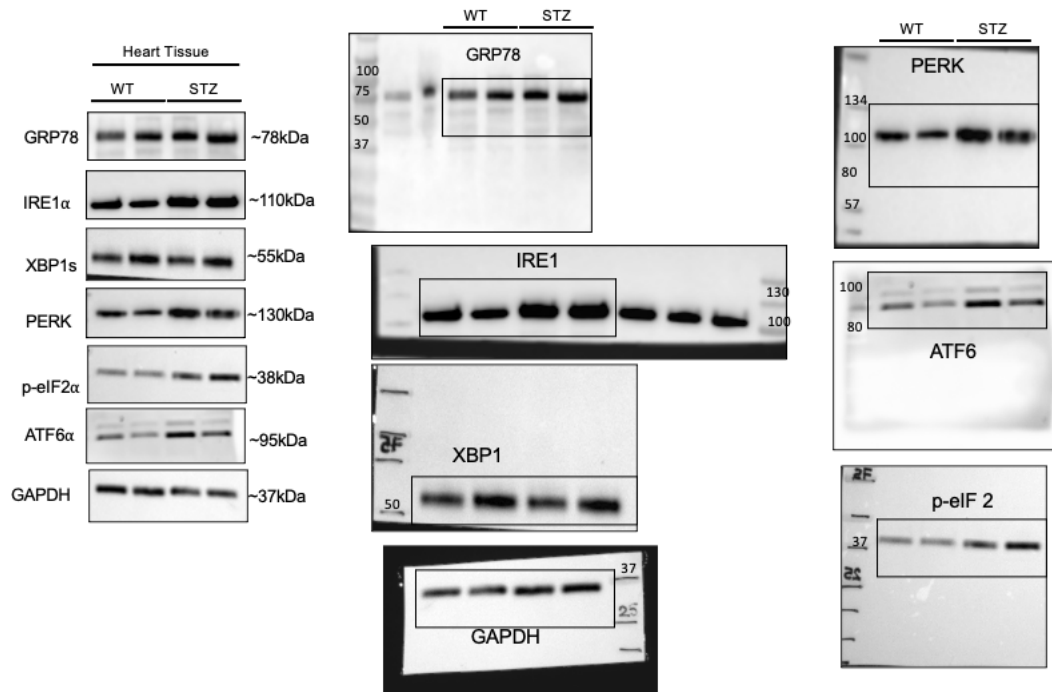

Supplement: NIHMS1822063-supplement-320530_Uncut_Gel_Blots.pdf [file NIHMS1822063-supplement-320530_Uncut_Gel_Blots.pdf]
