# Supplementary material
Source: PubMed Central journal article supplement (PMC9357223)
Supplement: NIHMS1822063-supplement-320530_Major_Resources_Table.pdf [file NIHMS1822063-supplement-320530_Major_Resources_Table.pdf]

## Major Resources Table

### Animals (in vivo studies)

| Species                                   | Vendor or Source   | Background Strain | Sex                  | Persistent ID / URL                                                               |
|-------------------------------------------|--------------------|-------------------|----------------------|-----------------------------------------------------------------------------------|
| C57BL/6J Wild Type Mice (Strain #:000664) | Jackson Laboratory | -                 | Both Male and Female | <a href="https://www.jax.org/strain/000664">https://www.jax.org/strain/000664</a> |

### Genetically Modified Animals

|                      | Strain                                                   | Vendor or Source   | Background Strain | Other Information | Persistent ID / URL |
|----------------------|----------------------------------------------------------|--------------------|-------------------|-------------------|---------------------|
| Parent – Male/Female | Eif2ak3tm1.2Drc/J (PERK <sup>loxP</sup> )                | Jackson Labs       | C57BL/6J          | Strain #: 023066  | MGI:1341830         |
| Parent – Male/Female | C57BL/6-Tg(Pf4-icre)Q3Rsko/J (Pf4 iCre)                  | Jackson Labs       | C57BL/6J          | Strain #: 008535  | MGI: J:127229       |
| Parent – Male/Female | Xbp1 <sup>tm1Glm</sup>                                   | Dr. Laura Glimcher | C57BL/6J          | -                 | MGI:2386788         |
| Parent – Male/Female | B6.Cg-Atf6 <sup>tm1Hota</sup> /J (ATF6 <sup>loxP</sup> ) | Jackson Labs       | C57BL/6J          | Strain #:028253   | MGI: J:213542       |

### Antibodies

| Target antigen  | Vendor or Source | Catalog #  | Dilution                | Persistent ID / URL                                                                                                                                                                                                                       |
|-----------------|------------------|------------|-------------------------|-------------------------------------------------------------------------------------------------------------------------------------------------------------------------------------------------------------------------------------------|
| GRP78           | Abcam            | ab21685    | WB: 1:1500<br>IF: 1:100 | <a href="https://www.abcam.com/grp78-bip-antibody-ab21685.html">https://www.abcam.com/grp78-bip-antibody-ab21685.html</a>                                                                                                                 |
| p-IRE1 $\alpha$ | Invitrogen       | PA5-105424 | WB: 1:1000              | <a href="https://www.thermofisher.com/antibody/product/Phospho-IRE1-alpha-Ser724-Antibody-Polyclonal/PA5-105424">https://www.thermofisher.com/antibody/product/Phospho-IRE1-alpha-Ser724-Antibody-Polyclonal/PA5-105424</a>               |
| IRE1 $\alpha$   | Sigma Aldrich    | I6785      | IF: 1:200               | <a href="https://www.sigmaaldrich.com/US/en/product/sigma/i6785">https://www.sigmaaldrich.com/US/en/product/sigma/i6785</a>                                                                                                               |
| IRE1 $\alpha$   | Invitrogen       | MA5-14991  | WB: 1:1000              | <a href="https://www.thermofisher.com/antibody/product/IRE1-alpha-Antibody-clone-J-607-10-Monoclonal/MA5-14991">https://www.thermofisher.com/antibody/product/IRE1-alpha-Antibody-clone-J-607-10-Monoclonal/MA5-14991</a>                 |
| p-PERK          | Invitrogen       | MA5-15033  | WB: 1:1000              | <a href="https://www.thermofisher.com/antibody/product/Phospho-PERK-Thr980-Antibody-clone-G-305-4-Monoclonal/MA5-15033">https://www.thermofisher.com/antibody/product/Phospho-PERK-Thr980-Antibody-clone-G-305-4-Monoclonal/MA5-15033</a> |
| PERK            | Proteintech      | 20582-1-AP | WB: 1:1000<br>IF: 1:100 | <a href="https://www.ptglab.com/products/PERK-Antibody-20582-1-AP.htm">https://www.ptglab.com/products/PERK-Antibody-20582-1-AP.htm</a>                                                                                                   |
| sXBP1 (Human)   | Cell Signaling   | 12782      | WB: 1:1000              | <a href="https://www.cellsignal.com/products/primary-antibodies/xbp-1s-d2c1f-rabbit-mab/12782">https://www.cellsignal.com/products/primary-antibodies/xbp-1s-d2c1f-rabbit-mab/12782</a>                                                   |
| sXBP1 (mouse)   | Cell Signaling   | 82914      | WB: 1:1000              | <a href="https://www.cellsignal.com/products/primary-antibodies/xbp-1s-e8y5f-rabbit-mab-rodent-specific/82914">https://www.cellsignal.com/products/primary-antibodies/xbp-1s-e8y5f-rabbit-mab-rodent-specific/82914</a>                   |

|                             |                |           |                         |                                                                                                                                                                                                                                                                                                                                                                                       |
|-----------------------------|----------------|-----------|-------------------------|---------------------------------------------------------------------------------------------------------------------------------------------------------------------------------------------------------------------------------------------------------------------------------------------------------------------------------------------------------------------------------------|
| ATF6                        | Invitrogen     | PA5-20216 | WB 1:1000               | <a href="https://www.thermofisher.com/antibody/product/ATF6-Antibody-Polyclonal/PA5-20216">https://www.thermofisher.com/antibody/product/ATF6-Antibody-Polyclonal/PA5-20216</a>                                                                                                                                                                                                       |
| GRP94                       | Cell Signaling | 20292     | WB: 1:1000              | <a href="https://www.cellsignal.com/products/primary-antibodies/grp94-d6x2q-xp-rabbit-mab/20292">https://www.cellsignal.com/products/primary-antibodies/grp94-d6x2q-xp-rabbit-mab/20292</a>                                                                                                                                                                                           |
| PDI                         | Cell Signaling | 2466S     | WB: 1:1000              | <a href="https://www.cellsignal.com/products/primary-antibodies/pdi-antibody/2446">https://www.cellsignal.com/products/primary-antibodies/pdi-antibody/2446</a>                                                                                                                                                                                                                       |
| Calreticulin                | Cell Signaling | 12238     | WB: 1:1000              | <a href="https://www.cellsignal.com/products/primary-antibodies/calreticulin-d3e6-xp-rabbit-mab/12238">https://www.cellsignal.com/products/primary-antibodies/calreticulin-d3e6-xp-rabbit-mab/12238</a>                                                                                                                                                                               |
| p-eIF2 $\alpha$             | Abcam          | Ab32157   | WB: 1:2000              | <a href="https://www.abcam.com/eif2s1-phospho-s51-antibody-e90-ab32157.html">https://www.abcam.com/eif2s1-phospho-s51-antibody-e90-ab32157.html</a>                                                                                                                                                                                                                                   |
| eIF2 $\alpha$               | Invitrogen     | MA5-31724 | WB: 1:1000              | <a href="https://www.thermofisher.com/antibody/product/EIF2A-Antibody-clone-3A7B11-Monoclonal/MA5-31724">https://www.thermofisher.com/antibody/product/EIF2A-Antibody-clone-3A7B11-Monoclonal/MA5-31724</a>                                                                                                                                                                           |
| Cleaved caspase-3           | Cell Signaling | 9664      | WB: 1:1000<br>IF: 1:400 | <a href="https://www.cellsignal.com/products/primary-antibodies/cleaved-caspase-3-asp175-5a1e-rabbit-mab/9664">https://www.cellsignal.com/products/primary-antibodies/cleaved-caspase-3-asp175-5a1e-rabbit-mab/9664</a>                                                                                                                                                               |
| Bcl-2                       | Cell Signaling | 3498      | WB: 1:1000              | <a href="https://www.cellsignal.com/products/primary-antibodies/bcl-2-d17c4-rabbit-mab-mouse-preferred/3498">https://www.cellsignal.com/products/primary-antibodies/bcl-2-d17c4-rabbit-mab-mouse-preferred/3498</a>                                                                                                                                                                   |
| Bax                         | Cell Signaling | 2772      | WB: 1:1000              | <a href="https://www.cellsignal.com/products/primary-antibodies/bax-antibody/2772">https://www.cellsignal.com/products/primary-antibodies/bax-antibody/2772</a>                                                                                                                                                                                                                       |
| p-p38                       | Cell Signaling | 4511      | WB: 1:1000              | <a href="https://www.cellsignal.com/products/primary-antibodies/2hosphor-p38-mapk-thr180-tyr182-d3f9-xp-rabbit-mab/4511">https://www.cellsignal.com/products/primary-antibodies/2hosphor-p38-mapk-thr180-tyr182-d3f9-xp-rabbit-mab/4511</a>                                                                                                                                           |
| p38                         | Cell Signaling | 14451     | WB: 1:1500              | <a href="https://www.cellsignal.com/products/antibody-conjugates/p38-mapk-d13e1-xp-rabbit-mab-hrp-conjugate/14451">https://www.cellsignal.com/products/antibody-conjugates/p38-mapk-d13e1-xp-rabbit-mab-hrp-conjugate/14451</a>                                                                                                                                                       |
| p-PLC $\gamma$ 2            | Cell Signaling | 3871      | WB: 1:1000              | <a href="https://www.cellsignal.com/products/primary-antibodies/2hosphor-plcg2-tyr1217-antibody/3871">https://www.cellsignal.com/products/primary-antibodies/2hosphor-plcg2-tyr1217-antibody/3871</a>                                                                                                                                                                                 |
| PLC $\gamma$ 2              | Cell Signaling | 3872      | WB: 1:1000              | <a href="https://www.cellsignal.com/products/primary-antibodies/plcg2-antibody/3872">https://www.cellsignal.com/products/primary-antibodies/plcg2-antibody/3872</a>                                                                                                                                                                                                                   |
| pPLC $\beta$ 3              | Cell Signaling | 29021     | WB: 1:1000              | <a href="https://www.cellsignal.com/products/primary-antibodies/2hosphor-plcbeta3-ser537-d8k2r-rabbit-mab/29021?site-search-type=Products&amp;N=4294956287&amp;Ntt=plc+beta&amp;fromPage=plp">https://www.cellsignal.com/products/primary-antibodies/2hosphor-plcbeta3-ser537-d8k2r-rabbit-mab/29021?site-search-type=Products&amp;N=4294956287&amp;Ntt=plc+beta&amp;fromPage=plp</a> |
| PLC $\beta$ 3               | Cell Signaling | 14247     | WB: 1:1000              | <a href="https://www.cellsignal.com/products/primary-antibodies/plcbeta3-d9d6s-rabbit-mab/14247">https://www.cellsignal.com/products/primary-antibodies/plcbeta3-d9d6s-rabbit-mab/14247</a>                                                                                                                                                                                           |
| p-Protein Kinase C $\delta$ | Cell Signaling | 9374      | WB: 1:1000              | <a href="https://www.cellsignal.com/products/primary-antibodies/2hosphor-pkcd-thr505-antibody/9374">https://www.cellsignal.com/products/primary-antibodies/2hosphor-pkcd-thr505-antibody/9374</a>                                                                                                                                                                                     |
| PKC $\delta$                | Cell Signaling | 2508      | WB: 1:1000              | <a href="https://www.cellsignal.com/products/primary-antibodies/pkcd-antibody/2058">https://www.cellsignal.com/products/primary-antibodies/pkcd-antibody/2058</a>                                                                                                                                                                                                                     |

|                                      |                |         |                      |                                                                                                                                                                                                                                                     |
|--------------------------------------|----------------|---------|----------------------|-----------------------------------------------------------------------------------------------------------------------------------------------------------------------------------------------------------------------------------------------------|
| p-Protein Kinase A C $\alpha$        | Cell Signaling | 4781    | WB: 1:1000           | <a href="https://www.cellsignal.com/products/primary-antibodies/3hosphor-pka-c-thr197-antibody/4781">https://www.cellsignal.com/products/primary-antibodies/3hosphor-pka-c-thr197-antibody/4781</a>                                                 |
| Protein Kinase A C $\alpha$          | Cell Signaling | 4782    | WB: 1:1000           | <a href="https://www.cellsignal.com/products/primary-antibodies/pka-c-a-antibody/4782">https://www.cellsignal.com/products/primary-antibodies/pka-c-a-antibody/4782</a>                                                                             |
| p-Akt                                | Cell Signaling | 9018    | WB: 1:1000           | <a href="https://www.cellsignal.com/products/primary-antibodies/3hosphor-akt1-ser473-d7f10-xp-rabbit-mab-akt1-specific/9018">https://www.cellsignal.com/products/primary-antibodies/3hosphor-akt1-ser473-d7f10-xp-rabbit-mab-akt1-specific/9018</a> |
| Akt                                  | Cell Signaling | 2938    | WB: 1:1500           | <a href="https://www.cellsignal.com/products/primary-antibodies/akt1-c73h10-rabbit-mab/2938">https://www.cellsignal.com/products/primary-antibodies/akt1-c73h10-rabbit-mab/2938</a>                                                                 |
| CHOP                                 | Cell Signaling | 2895    | WB: 1:1000           | <a href="https://www.cellsignal.com/products/primary-antibodies/chop-l63f7-mouse-mab/2895">https://www.cellsignal.com/products/primary-antibodies/chop-l63f7-mouse-mab/2895</a>                                                                     |
| ATF4                                 | Cell Signaling | 11815   | WB: 1:1000           | <a href="https://www.cellsignal.com/products/primary-antibodies/atf-4-d4b8-rabbit-mab/11815">https://www.cellsignal.com/products/primary-antibodies/atf-4-d4b8-rabbit-mab/11815</a>                                                                 |
| GAPDH                                | Cell Signaling | 8884    | WB: 1:4000           | <a href="https://www.cellsignal.com/products/antibody-conjugates/gapdh-d16h11-xp-rabbit-mab-hrp-conjugate/8884">https://www.cellsignal.com/products/antibody-conjugates/gapdh-d16h11-xp-rabbit-mab-hrp-conjugate/8884</a>                           |
| GAPDH                                | Cell Signaling | 2118    | WB: 1:3000           | <a href="https://www.cellsignal.com/products/primary-antibodies/gapdh-14c10-rabbit-mab/2118">https://www.cellsignal.com/products/primary-antibodies/gapdh-14c10-rabbit-mab/2118</a>                                                                 |
| Anti-rabbit IgG, HRP-linked Antibody | Cell Signaling | 7074    | WB: 1:5000           | <a href="https://www.cellsignal.com/products/secondary-antibodies/anti-rabbit-igg-hrp-linked-antibody/7074">https://www.cellsignal.com/products/secondary-antibodies/anti-rabbit-igg-hrp-linked-antibody/7074</a>                                   |
| Anti-mouse IgG, HRP-linked Antibody  | Cell Signaling | 7076    | WB: 1:5000           | <a href="https://www.cellsignal.com/products/secondary-antibodies/anti-mouse-igg-hrp-linked-antibody/7076">https://www.cellsignal.com/products/secondary-antibodies/anti-mouse-igg-hrp-linked-antibody/7076</a>                                     |
| P-selectin (CD62p, Human)            | Biologend      | 304918  | IF: 1:50             | <a href="https://www.biologend.com/en-us/products/alexa-fluor-647-anti-human-cd62p-p-selectin-antibody-3348">https://www.biologend.com/en-us/products/alexa-fluor-647-anti-human-cd62p-p-selectin-antibody-3348</a>                                 |
| FITC CD41 (Human)                    | Biologend      | 303704  | IF: 1:50<br>FC: 1:20 | <a href="https://www.biologend.com/en-us/products/fitc-anti-human-cd41-antibody-736">https://www.biologend.com/en-us/products/fitc-anti-human-cd41-antibody-736</a>                                                                                 |
| CD41 (Mouse)                         | Biologend      | 133903  | IF: 1:50             | <a href="https://www.biologend.com/en-us/products/fitc-anti-mouse-cd41-antibody-5896">https://www.biologend.com/en-us/products/fitc-anti-mouse-cd41-antibody-5896</a>                                                                               |
| CD41 (Mouse)                         | Biologend      | 133912  | FC: 1:25             | <a href="https://www.biologend.com/en-us/products/brilliant-violet-421-anti-mouse-cd41-antibody-7558">https://www.biologend.com/en-us/products/brilliant-violet-421-anti-mouse-cd41-antibody-7558</a>                                               |
| P-selectin (CD62p, Human)            | Biologend      | 304910  | FC: 1:20             | <a href="https://www.biologend.com/en-us/products/apc-anti-human-cd62p-p-selectin-antibody-592">https://www.biologend.com/en-us/products/apc-anti-human-cd62p-p-selectin-antibody-592</a>                                                           |
| P-selectin (CD62p, Mouse)            | Biologend      | 148304  | FC: 1:20             | <a href="https://www.biologend.com/en-us/products/apc-anti-mouse-rat-cd62p-p-selectin-antibody-10805">https://www.biologend.com/en-us/products/apc-anti-mouse-rat-cd62p-p-selectin-antibody-10805</a>                                               |
| Donkey anti-Rabbit IgG (H+L)         | Invitrogen     | A-21207 | IF: 1:400            | <a href="https://www.thermofisher.com/antibody/product/Donkey-anti-Rabbit-IgG-H-L-">https://www.thermofisher.com/antibody/product/Donkey-anti-Rabbit-IgG-H-L-</a>                                                                                   |

|                                                         |            |         |                     |                                                                                                                                                                                                                                                                                       |
|---------------------------------------------------------|------------|---------|---------------------|---------------------------------------------------------------------------------------------------------------------------------------------------------------------------------------------------------------------------------------------------------------------------------------|
| Antibody, Alexa Fluor™ 594                              |            |         |                     | Highly-Cross-Adsorbed-Secondary-Antibody-Polyclonal/A-21207                                                                                                                                                                                                                           |
| Donkey anti-Mouse IgG (H+L) Alexa Fluor™ 647            | Invitrogen | A-31571 | IF 1:400            | <a href="https://www.thermofisher.com/antibody/product/Donkey-anti-Mouse-IgG-H-L-Highly-Cross-Adsorbed-Secondary-Antibody-Polyclonal/A-31571">https://www.thermofisher.com/antibody/product/Donkey-anti-Mouse-IgG-H-L-Highly-Cross-Adsorbed-Secondary-Antibody-Polyclonal/A-31571</a> |
| FITC Mouse IgG1, κ Isotype Ctrl Antibody                | Biologend  | 400108  | IF: 1:50<br>FC:1:20 | <a href="https://www.biologend.com/en-us/products/fitc-mouse-igg1-kappa-isotype-ctrl-1406">https://www.biologend.com/en-us/products/fitc-mouse-igg1-kappa-isotype-ctrl-1406</a>                                                                                                       |
| Brilliant Violet 421™ Rat IgG1, κ Isotype Ctrl Antibody | Biologend  | 400439  | FC: 1:25            | <a href="https://www.biologend.com/en-us/products/brilliant-violet-421-rat-igg1-kappa-isotype-ctrl-7134">https://www.biologend.com/en-us/products/brilliant-violet-421-rat-igg1-kappa-isotype-ctrl-7134</a>                                                                           |
| FITC Rat IgG1, κ Isotype Ctrl Antibody                  | Biologend  | 400406  | IF 1:50             | <a href="https://www.biologend.com/en-us/products/fitc-rat-igg1-kappa-isotype-ctrl-1828">https://www.biologend.com/en-us/products/fitc-rat-igg1-kappa-isotype-ctrl-1828</a>                                                                                                           |
| APC Mouse IgG2a, κ Isotype Ctrl Antibody                | Biologend  | 400220  | FC: 1:25            | <a href="https://www.biologend.com/en-us/products/apc-mouse-igg2a-kappa-isotype-ctrl-1397">https://www.biologend.com/en-us/products/apc-mouse-igg2a-kappa-isotype-ctrl-1397</a>                                                                                                       |
| APC Mouse IgG1, κ Isotype Ctrl Antibody                 | Biologend  | 400120  | FC: 1:25            | <a href="https://www.biologend.com/en-us/products/apc-mouse-igg1-kappa-isotype-ctrl-1404">https://www.biologend.com/en-us/products/apc-mouse-igg1-kappa-isotype-ctrl-1404</a>                                                                                                         |

## Kits

| Reagents & Kits                                                 | Vendor or Source | Catalog # | Persistent ID / URL                                                                                                                                                                                                                                                     |
|-----------------------------------------------------------------|------------------|-----------|-------------------------------------------------------------------------------------------------------------------------------------------------------------------------------------------------------------------------------------------------------------------------|
| Color-coded Prestained Protein Marker, Broad Range (10-250 kDa) | Cell Signaling   | 74124     | <a href="https://www.cellsignal.com/products/experimental-controls/color-coded-prestained-protein-marker-broad-range-10-250-kda/74124">https://www.cellsignal.com/products/experimental-controls/color-coded-prestained-protein-marker-broad-range-10-250-kda/74124</a> |
| Color-coded Prestained Protein Marker, Broad Range (11-250 kDa) | Cell Signaling   | 14208     | <a href="https://www.cellsignal.com/products/wb-ip-reagents/color-coded-prestained-protein-marker-broad-range-11-250-kda/14208">https://www.cellsignal.com/products/wb-ip-reagents/color-coded-prestained-protein-marker-broad-range-11-250-kda/14208</a>               |
| Prestained protein marker                                       | Proteintech      | PL00001   | <a href="https://www.ptglab.com/products/Prestained-protein-marker-PL00001.htm">https://www.ptglab.com/products/Prestained-protein-marker-PL00001.htm</a>                                                                                                               |
| Prestained Protein Ladder (extra broad range)                   | Abcam            | ab234592  | <a href="https://www.abcam.com/prestained-protein-ladder--extra-broad-molecular-weight-65--270-kda-ab234592.html">https://www.abcam.com/prestained-protein-ladder--extra-broad-molecular-weight-65--270-kda-ab234592.html</a>                                           |
| Precision Plus Protein Dual Color Standards                     | Biorad           | 1610374   | <a href="https://www.bio-rad.com/en-us/sku/1610374-precision-plus-protein-dual-color-standards-500-ul?ID=1610374">https://www.bio-rad.com/en-us/sku/1610374-precision-plus-protein-dual-color-standards-500-ul?ID=1610374</a>                                           |

|                                                                    |                              |              |                                                                                                                                                                                                                                                           |
|--------------------------------------------------------------------|------------------------------|--------------|-----------------------------------------------------------------------------------------------------------------------------------------------------------------------------------------------------------------------------------------------------------|
| Precision Plus Protein™ Kaleidoscope™ Prestained Protein Standards | Biorad                       | 1610375      | <a href="https://www.bio-rad.com/en-us/sku/1610375-precision-plus-protein-kaleidoscope-prestained-protein-standards?ID=1610375">https://www.bio-rad.com/en-us/sku/1610375-precision-plus-protein-kaleidoscope-prestained-protein-standards?ID=1610375</a> |
| PageRuler™ Plus Prestained Protein Ladder                          | Thermo Scientific            | 26620        | <a href="https://www.thermofisher.com/order/catalog/product/26620#/26620">https://www.thermofisher.com/order/catalog/product/26620#/26620</a>                                                                                                             |
| Spectra™ Multicolor Broad Range Protein Ladder                     | Thermo Scientific            | 26634        | <a href="https://www.thermofisher.com/order/catalog/product/26634?SID=srch-srp-26634">https://www.thermofisher.com/order/catalog/product/26634?SID=srch-srp-26634</a>                                                                                     |
| Restore™ PLUS Western Blot Stripping Buffer                        | Thermo Scientific            | 46430        | <a href="https://www.thermofisher.com/order/catalog/product/46430">https://www.thermofisher.com/order/catalog/product/46430</a>                                                                                                                           |
| RIPA Buffers                                                       | Cell Signaling               | 9806         | <a href="https://www.cellsignal.com/products/buffers-dyes/ripa-buffer-10x/9806">https://www.cellsignal.com/products/buffers-dyes/ripa-buffer-10x/9806</a>                                                                                                 |
| P-Selectin Mouse ELISA Kit                                         | Invitrogen                   | EMSELP       | <a href="https://www.thermofisher.com/elisa/product/P-Selectin-Mouse-ELISA-Kit/EMSELP">https://www.thermofisher.com/elisa/product/P-Selectin-Mouse-ELISA-Kit/EMSELP</a>                                                                                   |
| P-Selectin (Soluble) (CD62) Human ELISA Kit                        | Invitrogen                   | BMS219-4     | <a href="https://www.thermofisher.com/elisa/product/P-Selectin-Soluble-CD62-Human-ELISA-Kit/BMS219-4">https://www.thermofisher.com/elisa/product/P-Selectin-Soluble-CD62-Human-ELISA-Kit/BMS219-4</a>                                                     |
| PROTEOSTAT® Protein aggregation assay                              | Enzo Life Sciences           | ENZ-51023    | <a href="https://www.enzolifesciences.com/ENZ-51023/proteostat-protein-aggregation-assay/">https://www.enzolifesciences.com/ENZ-51023/proteostat-protein-aggregation-assay/</a>                                                                           |
| PROTEOSTAT® Protein aggregation standards                          | Enzo Life Sciences           | ENZ-51039    | <a href="https://www.enzolifesciences.com/ENZ-51039/">https://www.enzolifesciences.com/ENZ-51039/</a>                                                                                                                                                     |
| Pierce™ BCA Protein Assay Kit                                      | Thermo Scientific            | 23225        | <a href="https://www.thermofisher.com/order/catalog/product/23225?SID=srch-srp-23225">https://www.thermofisher.com/order/catalog/product/23225?SID=srch-srp-23225</a>                                                                                     |
| SuperSignal™ West Pico PLUS Chemiluminescent Substrate             | Thermo Scientific            | 34577        | <a href="https://www.thermofisher.com/order/catalog/product/34577">https://www.thermofisher.com/order/catalog/product/34577</a>                                                                                                                           |
| SuperSignal™ West Femto Maximum Sensitivity Substrate              | Thermo Scientific            | 34096        | <a href="https://www.thermofisher.com/order/catalog/product/34096">https://www.thermofisher.com/order/catalog/product/34096</a>                                                                                                                           |
| Protein Carbonyl Content Assay Kit                                 | Abcam                        | ab126287     | <a href="https://www.abcam.com/protein-carbonyl-content-assay-kit-ab126287.html">https://www.abcam.com/protein-carbonyl-content-assay-kit-ab126287.html</a>                                                                                               |
| Carstairs Staining Kit                                             | Electron Microscopy Sciences | 26381-Series | <a href="https://www.emsdiasum.com/microscopy/technical/datasheet/26381.aspx">https://www.emsdiasum.com/microscopy/technical/datasheet/26381.aspx</a>                                                                                                     |
| Zymograph Direct-zol kit                                           | Zymo Reseach                 | R2050        | <a href="https://www.zymoresearch.com/products/direct-zol-rna-miniprep-kits">https://www.zymoresearch.com/products/direct-zol-rna-miniprep-kits</a>                                                                                                       |
| Caspase-3 activity kit (colorimetric)                              | Abcam                        | ab39401      | <a href="https://www.abcam.com/caspase-3-assay-kit-colorimetric-ab39401.html">https://www.abcam.com/caspase-3-assay-kit-colorimetric-ab39401.html</a>                                                                                                     |
| iScript cDNA synthesis kit                                         | Bio-Rad                      | 1708891      | <a href="https://www.bio-rad.com/en-us/sku/1708891-iscript-cdna-synthesis-kit-100-x-20-ul-rxns?ID=1708891">https://www.bio-rad.com/en-us/sku/1708891-iscript-cdna-synthesis-kit-100-x-20-ul-rxns?ID=1708891</a>                                           |

|                                                               |        |           |                                                                                                                                                                                                                                                                                                                                                                   |
|---------------------------------------------------------------|--------|-----------|-------------------------------------------------------------------------------------------------------------------------------------------------------------------------------------------------------------------------------------------------------------------------------------------------------------------------------------------------------------------|
| Human Unfolded Protein Response RT2 Profiler PCR Array System | Qiagen | PAHS-089Z | <a href="https://www.qiagen.com/us/products/discovery-and-translational-research/pcr-qpcr-dpcr/qpcr-assays-and-instruments/mrna-incrna-qpcr-assays-panels/rt2-profiler-pcr-arrays/">https://www.qiagen.com/us/products/discovery-and-translational-research/pcr-qpcr-dpcr/qpcr-assays-and-instruments/mrna-incrna-qpcr-assays-panels/rt2-profiler-pcr-arrays/</a> |
|---------------------------------------------------------------|--------|-----------|-------------------------------------------------------------------------------------------------------------------------------------------------------------------------------------------------------------------------------------------------------------------------------------------------------------------------------------------------------------------|
